# Supplementary material for: RACGAP1 promotes the progression and poor prognosis of lung adenocarcinoma through its effects on the cell cycle and tumor stemness
Source: Springer Nature journal article supplement (doi:10.1186/s12885-023-11761-x), 2024-01-02

# Figure 4A

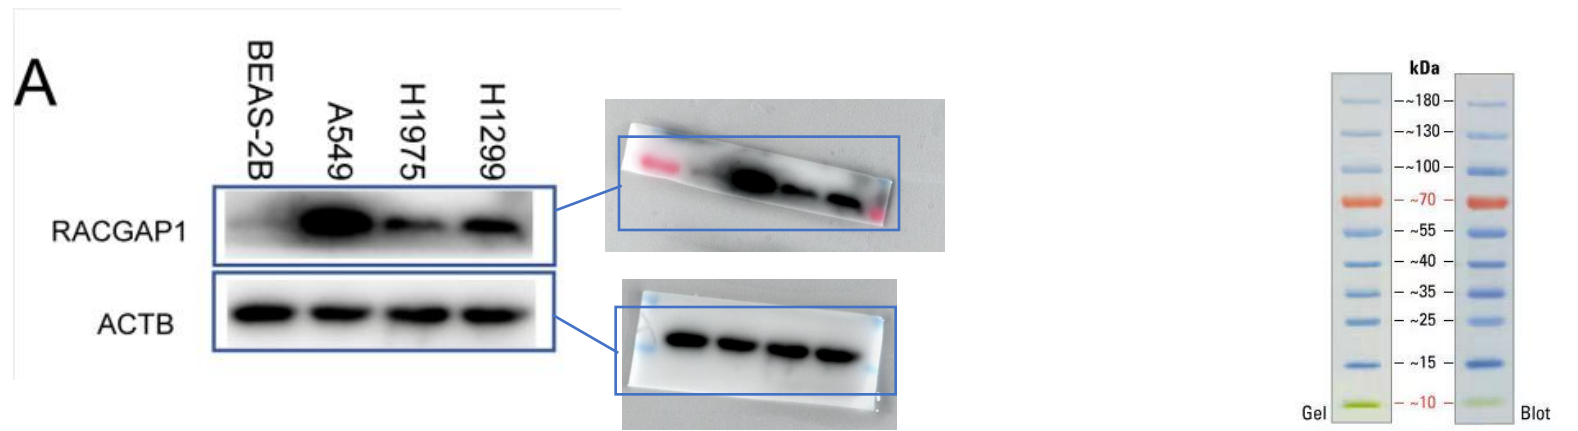

# Figure 5D

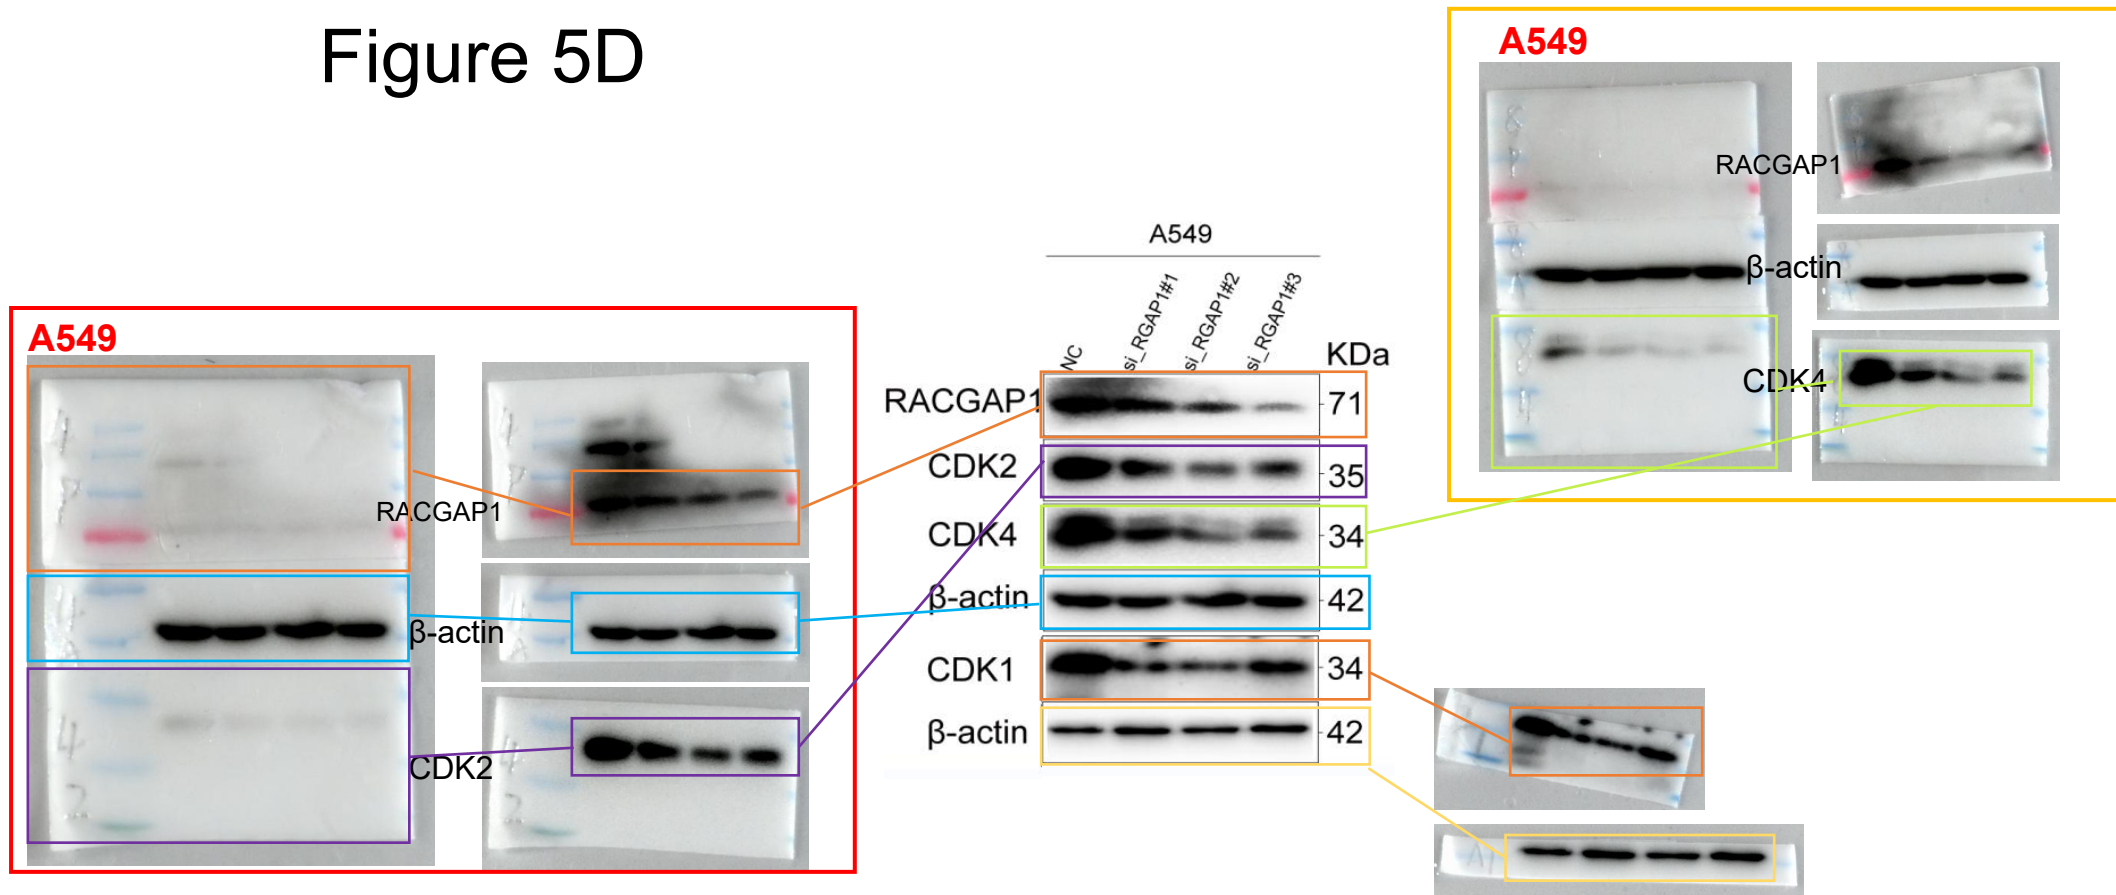

# Figure 5D

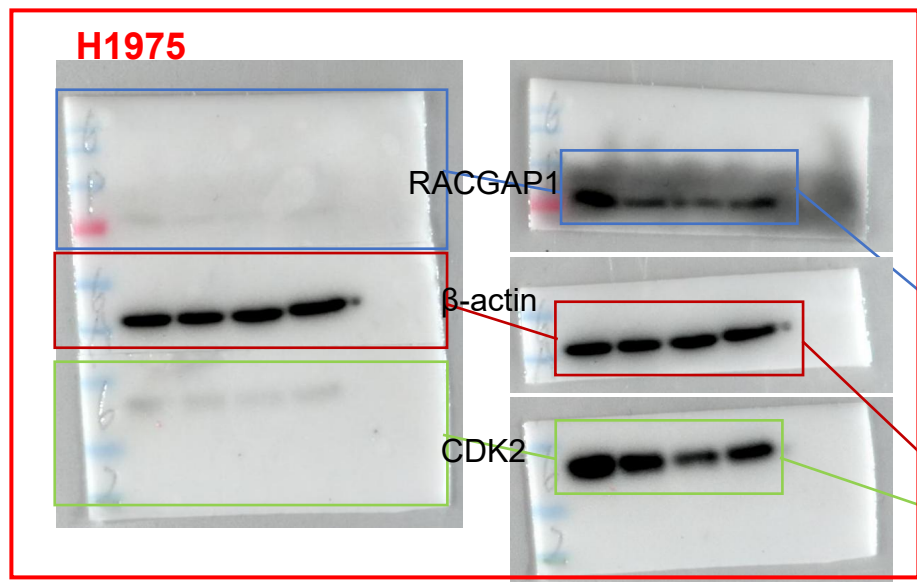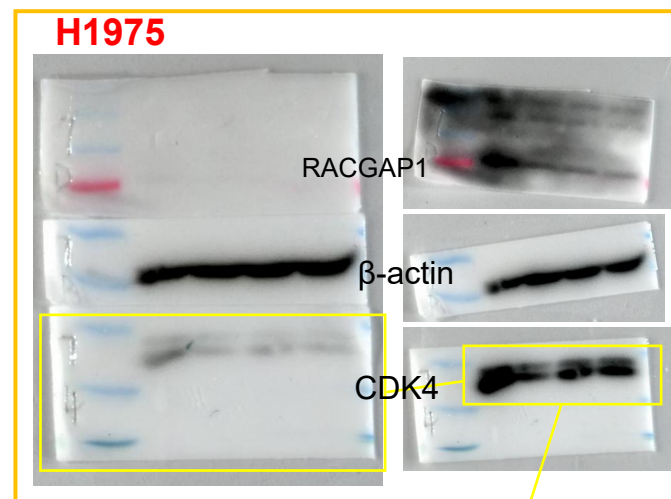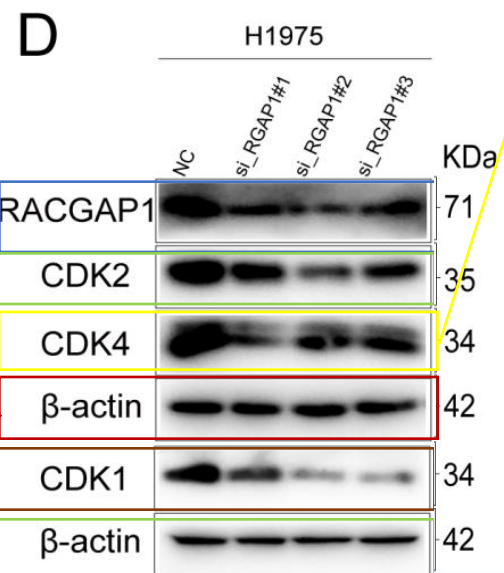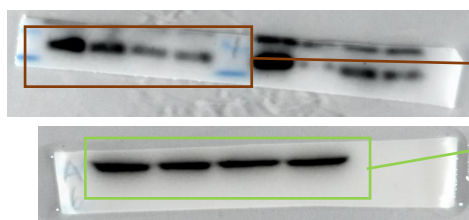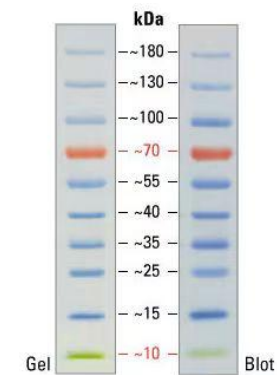

# Figure 5E

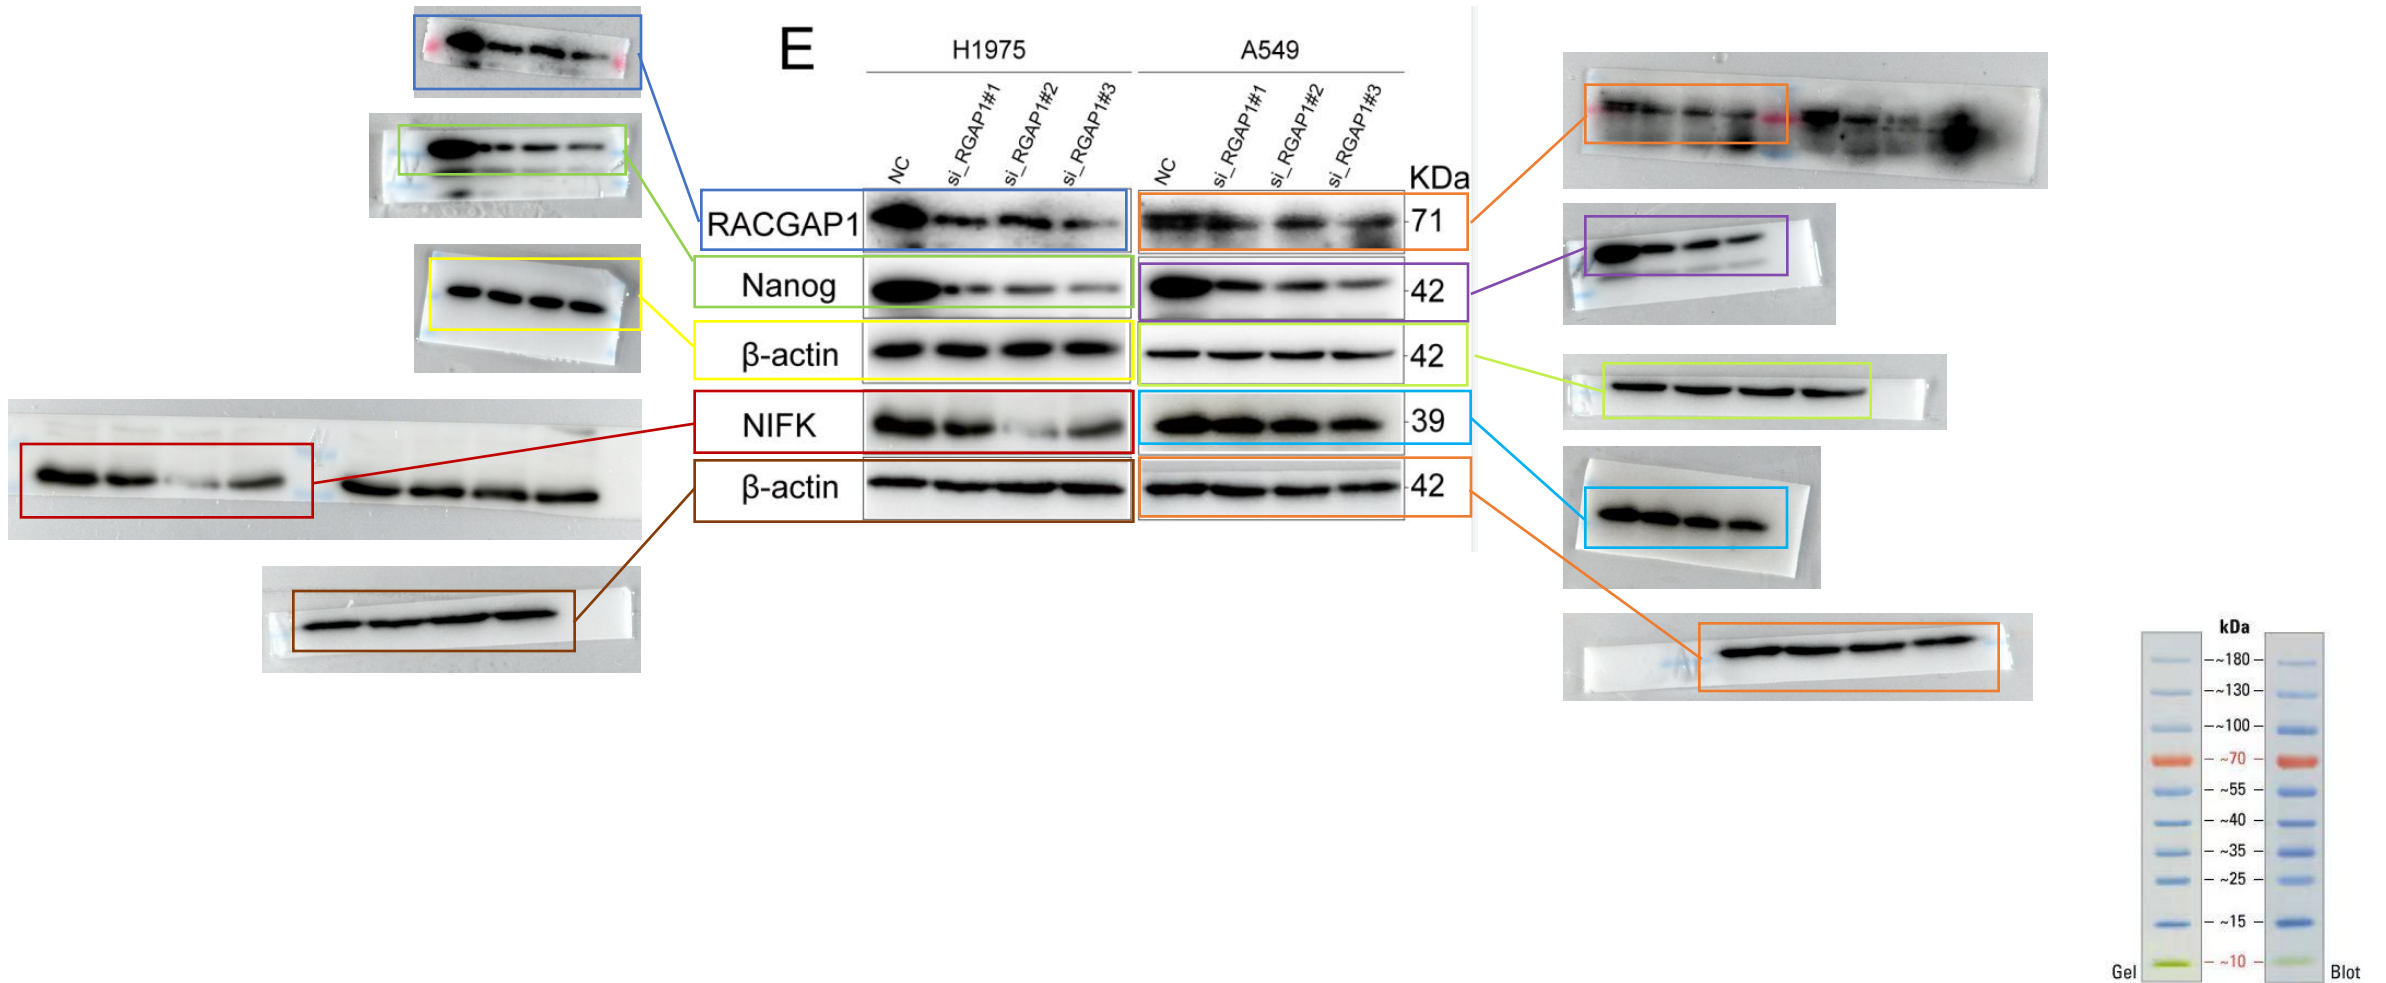

Supplement: MOESM1 [file 26582970]
